# Supplementary material for: The Precise Structures and Stereochemistry of Trihydroxy-linoleates Esterified in Human and Porcine Epidermis and Their Significance in Skin Barrier Function: IMPLICATION OF AN EPOXIDE HYDROLASE IN THE TRANSFORMATIONS OF LINOLEATE
Source: PubMed Central journal article supplement (PMC4938176; doi:10.1074/jbc.m115.711267), 2016-05-05

## SUPPLEMENTAL DATA

### **The Precise Structures and Stereochemistry of Trihydroxy-Linoleates Esterified in Human and Porcine Epidermis and Their Significance in Skin Barrier Function: IMPLICATION OF AN EPOXIDE HYDROLASE IN THE TRANSFORMATIONS OF LINOLEATE**

**Takahito Chiba, Christopher P. Thomas M. Wade Calcutt, William E. Boeglin,  
Valerie B. O'Donnell, and Alan R. Brash**

Fig. S1. Analytical procedures for the identification of free and esterified products in epidermis

Fig. S2. Analytical procedures for the quantitation of free and esterified 9-HODE, epoxyalcohol (EpOH) and triols in epidermis.

Fig. S3 LC-MS analysis of the free (non-esterified) 9-HODE in human epidermis

Fig. S4 Chiral analysis of 9-HODE in human epidermis

Fig. S5 LC-MS analysis of the free (non-esterified) linoleate epoxyalcohol in human epidermis

Fig. S6 Chiral column LC-MS analysis of the stereochemistry of the major epoxyalcohol esterified in human epidermis

Fig. S7 LC-MS analysis of the free (non-esterified) linoleate triol in human epidermis

Fig. S8 The profile of protein-bound triols in pig epidermis

### Figure S1. Analysis of free and esterified products in epidermis

Purification scheme for analysis of triols in human and pig epidermis. After extraction from epidermis using  $\text{CHCl}_3/\text{MeOH}$  and open-bed silica fractionation, separate aliquots were analyzed for free triols (left-hand arm) and esterified triols (middle and right-hand arms). Esterified triols were released by alkaline hydrolysis overnight. After Bligh & Dyer partitioning to remove neutral and non-polar lipids in the  $\text{CHCl}_3$  phase, samples were either extracted on an Oasis HLB cartridge at pH 6 (to avoid hydrolysis of epoxyalcohols to triols), or after standing at room temperature at pH 3 for 30 min to allow acid hydrolysis of epoxyalcohols. The recovered triols were converted to the PFB DMP derivative and analyzed by HPLC, GC-MS and LC-MS.

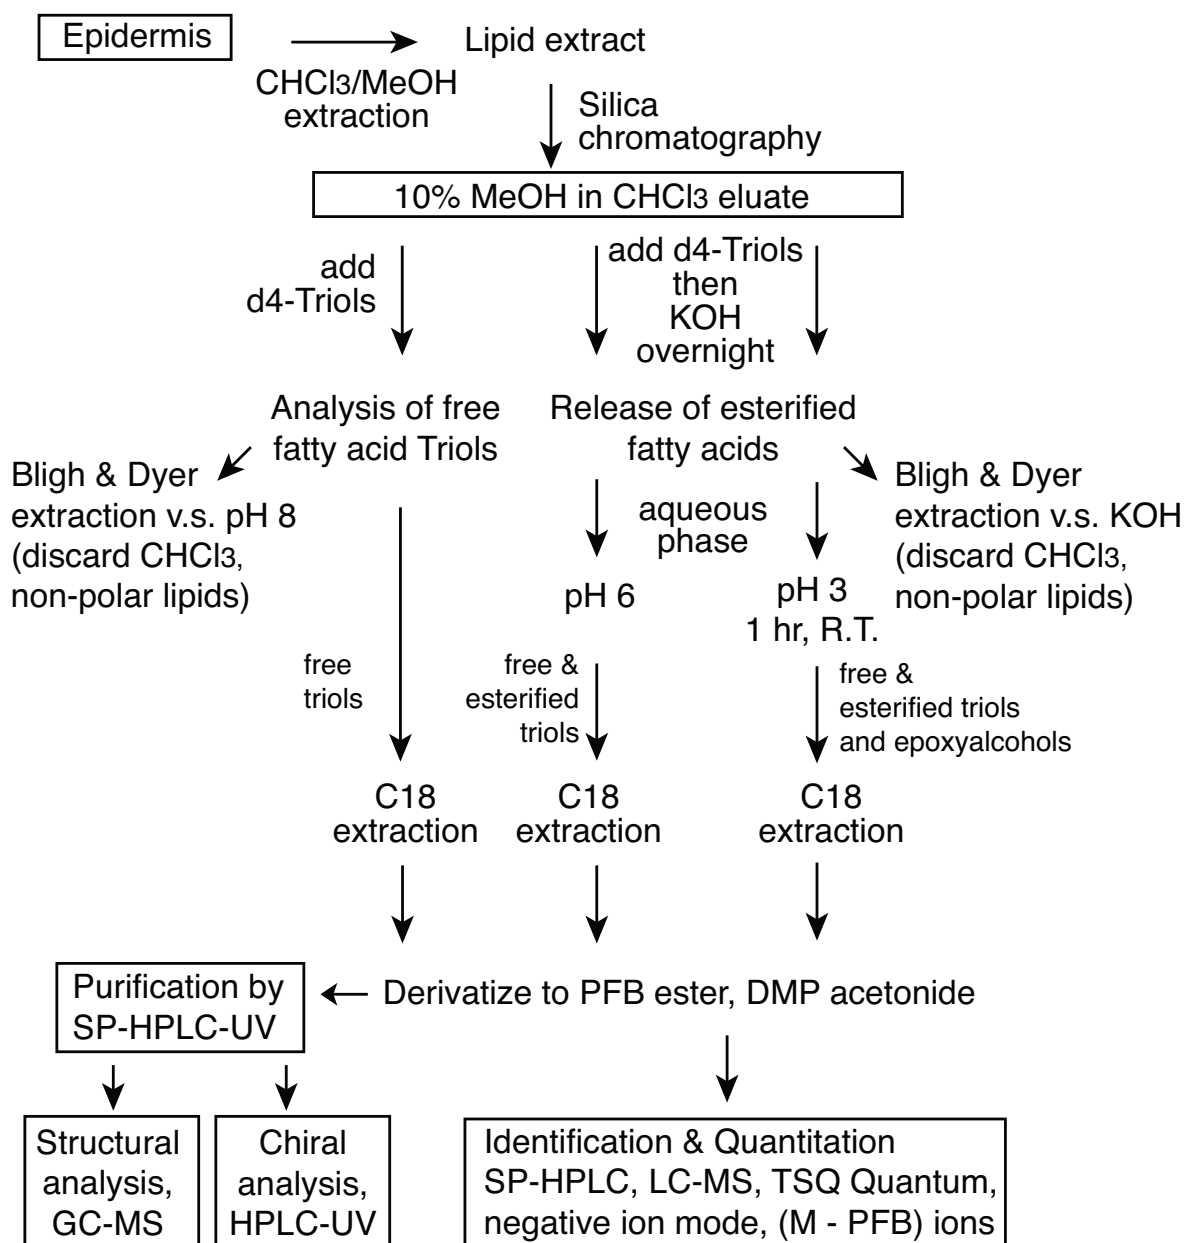

**Figure S2. Quantitation of free and esterified 9-HODE, epoxyalcohol (EpOH) and triols in epidermis.**

After the initial extraction and open-bed silica column, free fatty acid products are taken through the left-hand arm of the scheme; Bligh and Dyer partition using 0.1 M  $K_2HPO_4$  as the aqueous phase allows removal of neutral and non-polar lipids in the  $CHCl_3$  while retaining the ionized fatty acids in the aqueous layer; the free acids in the mildly alkaline solution are subsequently retained on an Oasis HLB cartridge, eluted with EtOAc and derivatized for LC-MS analyses. The right-hand arm follows a similar protocol after esterified products are released by KOH treatment overnight.

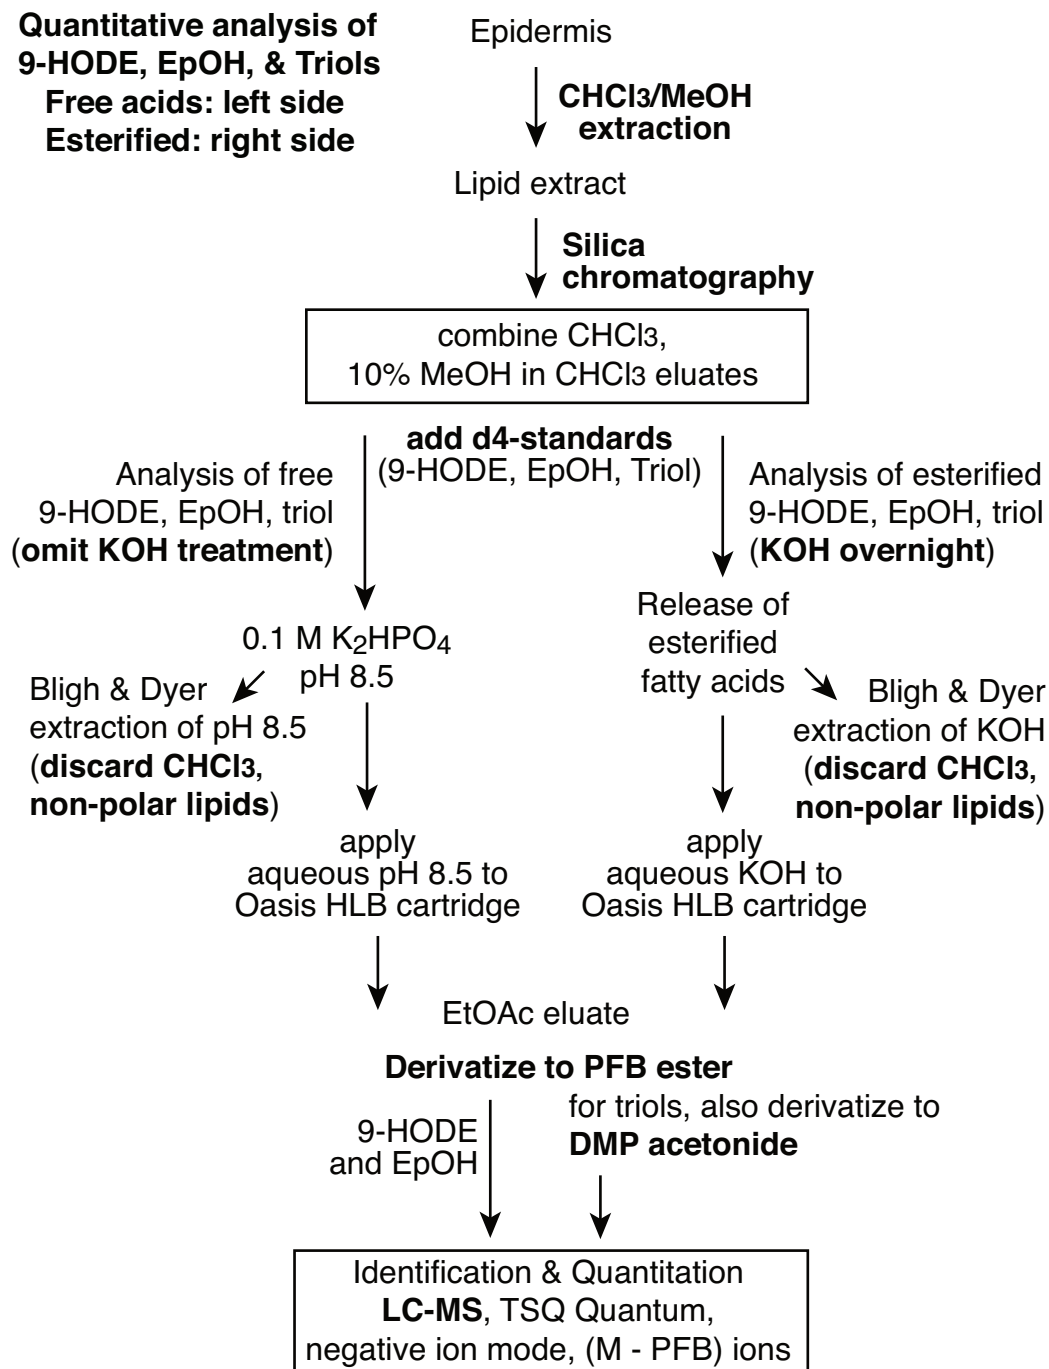

### Fig S3: LC-MS analysis of the free (non-esterified) 9-HODE in human epidermis

The analyses used a Thomson Scientific Advantage 5 $\mu$  silica column (25 x 0.46 cm), with a solvent of solvent hexane/IPA (100:0.5 v/v), flow rate 1 ml/min, and LC-MS detection of the PFB ester (M – PFB ion) at m/z 295 (d0) and 299 (d4). The early peak at ~6.6 min in the m/z 295 channel (d0) is 13-HODE.

The chromatogram is representative of the epidermis from three different subjects.

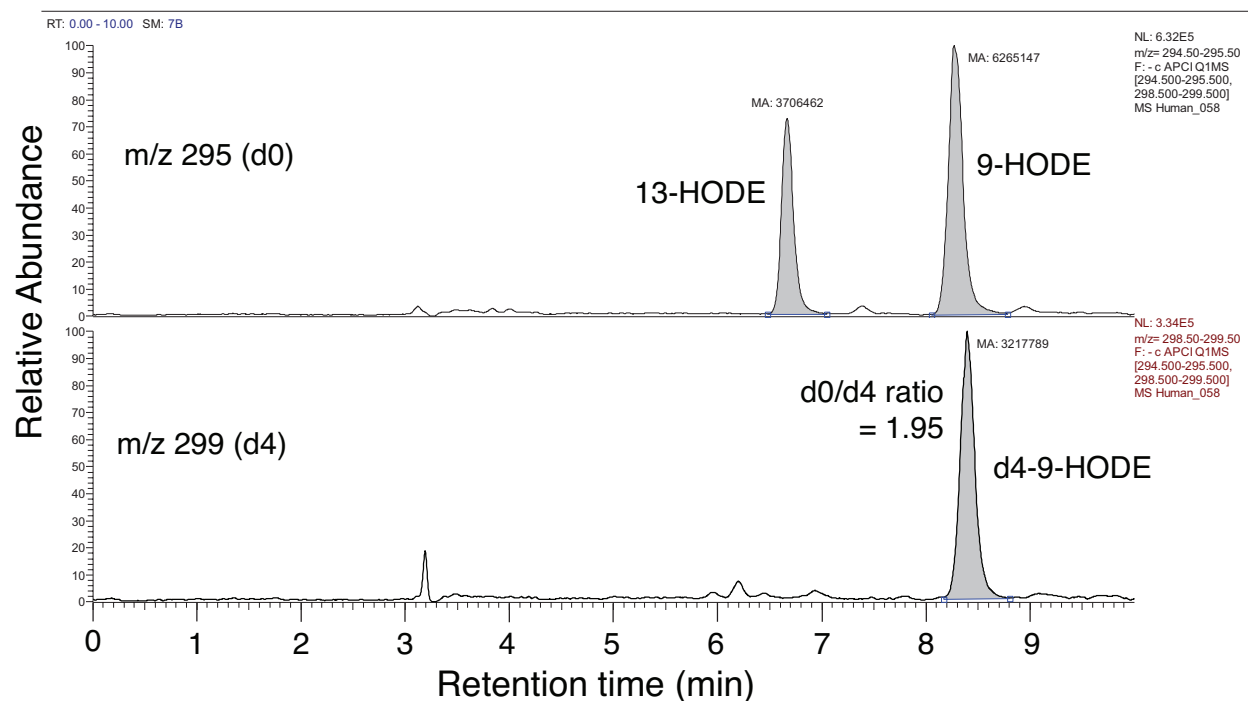

### Fig. S4: Chiral HPLC analysis of 9-HODE from human epidermis

The analyses used a Chiralcel OD-H column (25 x 0.46 cm), a solvent of hexane/IPA (100:5 v/v) and a flow rate of 1 ml/min with UV-detection of the conjugated diene chromophore at 235 nm. Epidermis from three different individuals were analyzed: the percentage of 9*R* enantiomer was 79.8%, 85.5% (shown above), and 85.7%.

The analyses were conducted on the total 9-HODE (free plus esterified).

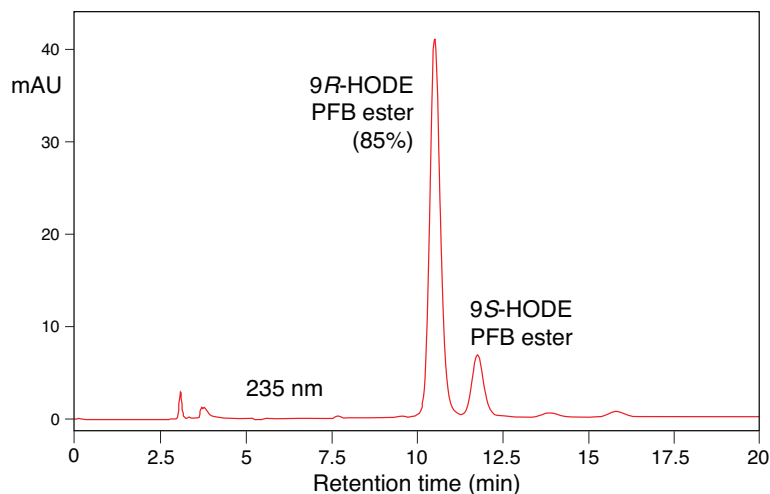

**Fig. S5: LC-MS analysis of the free (non-esterified) epoxyalcohol in human epidermis**

The ratio of d0/d4 epoxyalcohol in this analysis is 0.0025, corresponding to only ~2% of the esterified epoxyalcohol.

(By comparison, the d0/d4 ratio measured for esterified epoxyalcohol is approximately 0.5, Fig. 10B).

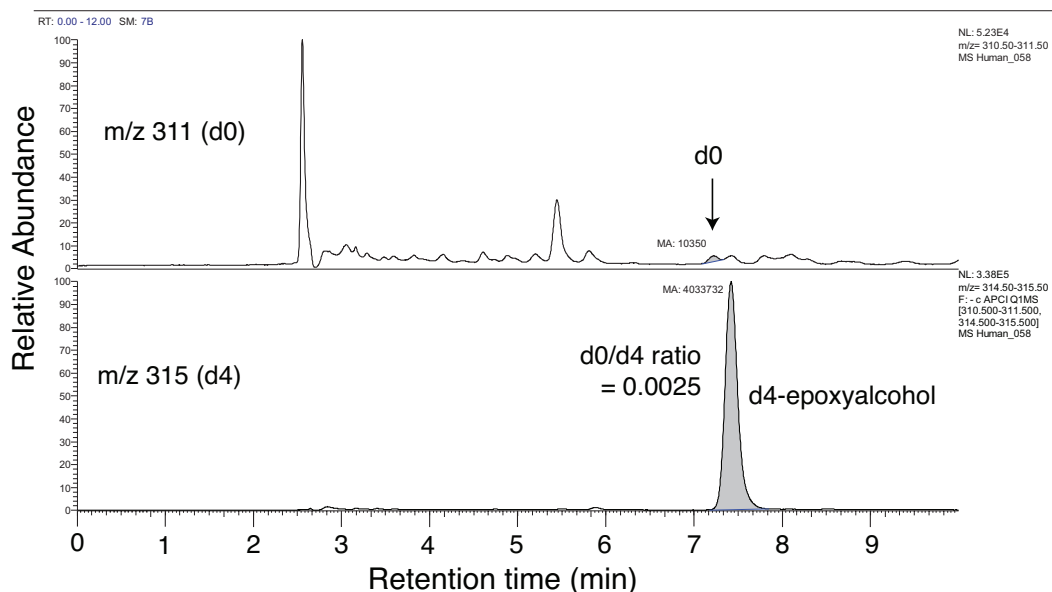

**Fig S6: Chiral column LC-MS analysis of the chirality of the major epoxyalcohol esterified in human epidermis as 9R,10R-trans-epoxy-13R-hydroxy-octadec-11E-enoate.**

The analysis used a Chiralcel OJ column (25 x 0.46 cm), a solvent of hexane/IPA (100:10 v/v), a flow rate 1 ml/min, with LC-MS detection of PFB ester monitoring the [M – PFB]- ion at m/z 311.

Epidermis from three different individuals were analyzed: the percentage of RRR enantiomer was 88%, 97% (shown above), and 98%.

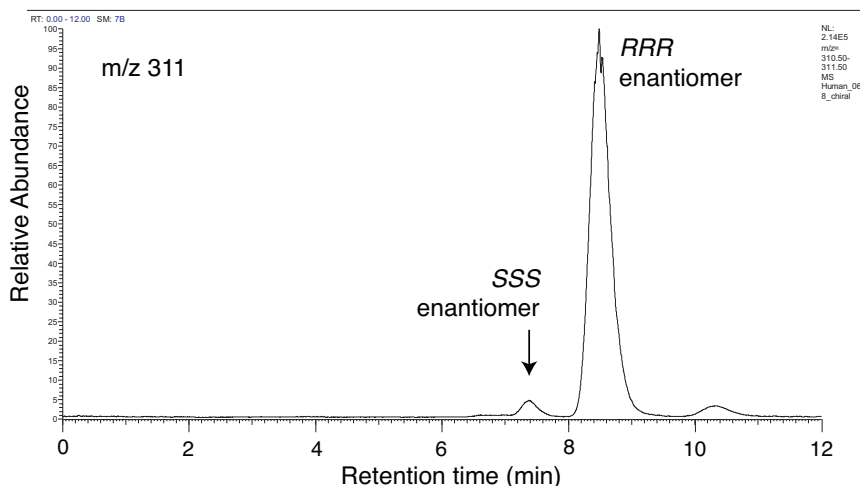

**Fig. S7 LC-MS analysis of the free (non-esterified) linoleate triols in human epidermis**

The samples were analyzed for free (non-esterified) linoleate triols using the method summarized in Fig 2B of the main text. Detection of the PFB ester, DMP derivative for unlabeled triols ( $m/z$  369) and the d4-triol-3 and d4-triol-4 detected at  $m/z$  373.

(By comparison, the d0/d4 ratio measured for esterified triol-3 is approximately 220 parts per thousand, Fig. 10C).

The peak at  $\sim 7.7$  min below in the d0 channel is a contaminant of pinellic acid (triol-2) used to check the derivatization.

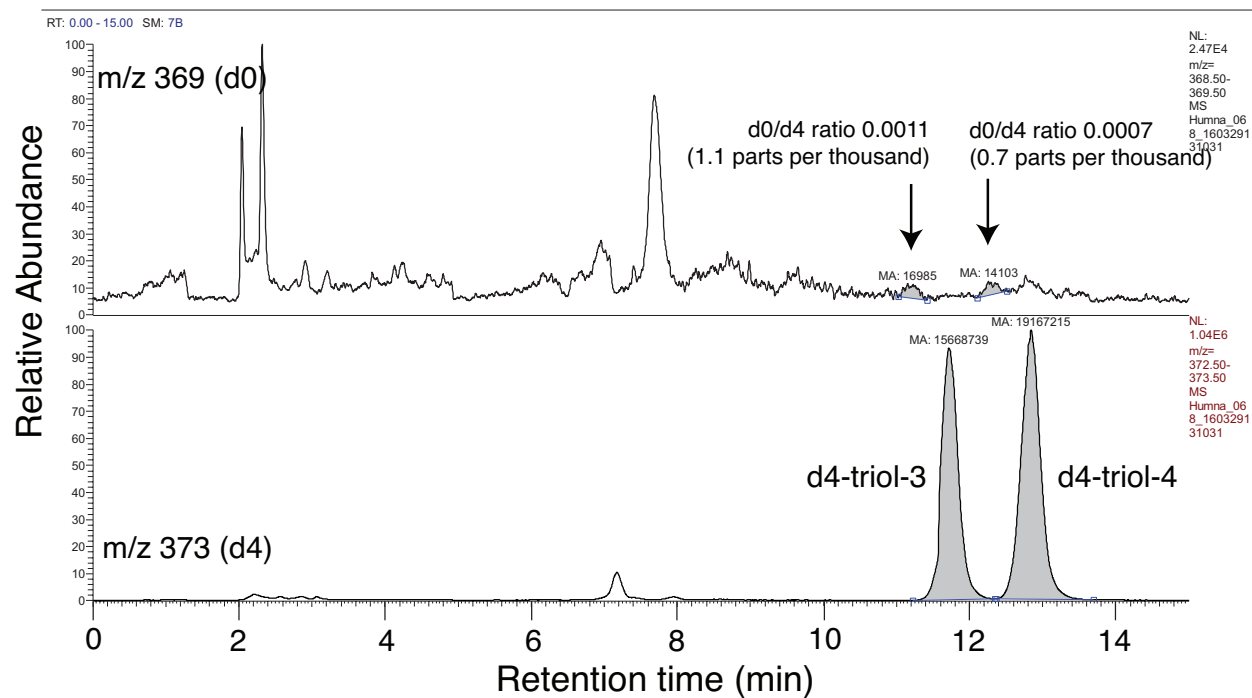

**Fig. S8 (A, top) The profile of protein-bound triols in pig epidermis compared with  $\text{CHCl}_3/\text{MeOH}$  soluble esterified triols (B, below).**

Normal-phase LC-MS analysis of the PFB ester DMP acetonide derivative using a Thomson Advantage 5  $\mu$  silica column with a solvent of hexane/IPA (100:1, v/v), a flow rate of 1 ml/min with monitoring of the  $[\text{M} - \text{PFB}]^-$  ion at  $m/z$  369.

The numbers correspond to the linoleate triols shown in Fig. 3 of the main text. The intensity of the major esterified triol-3 (lower panel) was over 10-fold higher than the corresponding protein-bound triol.

We conclude that non-specific oxidation accounts for these comparatively low levels of protein bound triols and that coupling of EOS-triol to protein (the  $\alpha$  hydroxyl on the triol moiety) is of minor consequence compared to protein binding via the omega-OH of ceramide OS.

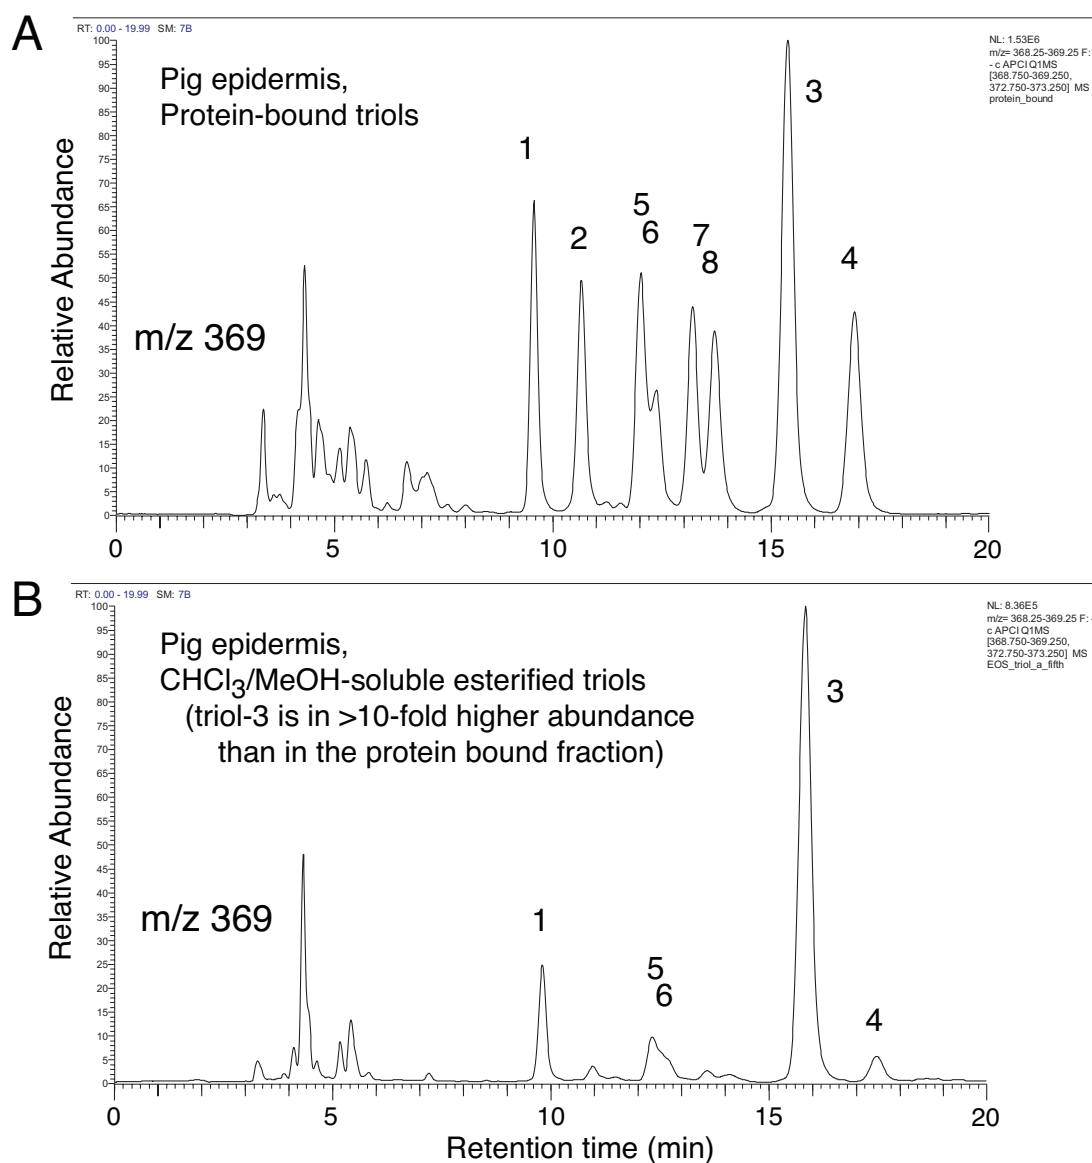

Supplement: 10.1074_M115.711267_jbc.M115.711267-1.pdf [file 10.1074_M115.711267_jbc.M115.711267-1.pdf]
